# Supplementary material for: BECLIN1 is essential for intestinal homeostasis involving autophagy-independent mechanisms through its function in endocytic trafficking
Source: PubMed Central journal article supplement (PMC10879175; doi:10.1038/s42003-024-05890-7), 2024-02-20
Supplement: 42003_2024_5890_MOESM2_ESM.pdf [file 42003_2024_5890_MOESM2_ESM.pdf]

1 **BECLIN1 is essential for intestinal homeostasis involving autophagy-independent**  
2 **mechanisms through its function in endocytic trafficking**  
3 **(Supplementary information)**  
4

5 Sharon Tran<sup>1,2,#</sup>, Juliani Juliani<sup>1,2,3,4,#</sup>, Tiffany J. Harris<sup>1,2</sup>, Marco Evangelista<sup>1,2</sup>, Julian  
6 Ratcliffe<sup>5</sup>, Sarah L. Ellis<sup>1,2</sup>, David Baloyan<sup>1,2</sup>, Camilla M. Reehorst<sup>1,2</sup>, Rebecca  
7 Nightingale<sup>1,2</sup>, Ian Y. Luk<sup>1,2</sup>, Laura J. Jenkins<sup>1,2</sup>, Sonia Ghilas<sup>1,2</sup>, Marina H. Yakou<sup>1,2</sup>,  
8 Chantelle Inguanti<sup>1,2</sup>, Chad Johnson<sup>5</sup>, Michael Buchert<sup>1,2</sup>, James C. Lee<sup>6,7</sup>, Peter De Cruz<sup>8,9</sup>,  
9 Kinga Duszyc<sup>10</sup>, Paul A. Gleeson<sup>11</sup>, Benjamin T. Kile<sup>12</sup>, Lisa A. Mielke<sup>1,2</sup>, Alpha S. Yap<sup>10</sup>,  
10 John M. Mariadason<sup>1,2</sup>, W. Douglas Fairlie<sup>1,2,3,4,\*</sup>, Erinna F. Lee<sup>1,2,3,4,\*</sup>  
11

12 \*Corresponding authors:

13 E.F. Lee

14 [Erinna.Lee@latrobe.edu.au](mailto:Erinna.Lee@latrobe.edu.au)  
15

16 W.D. Fairlie

17 [Doug.Fairlie@onjcri.org.au](mailto:Doug.Fairlie@onjcri.org.au)  
18

19 [#These authors contributed equally to the work.](#)  
20

21 <sup>1</sup>Olivia Newton-John Cancer Research Institute, Heidelberg, VIC, Australia, <sup>2</sup>School of Cancer  
22 Medicine, La Trobe University, Bundoora, VIC, Australia, <sup>3</sup>Department of Biochemistry and  
23 Chemistry, School of Agriculture, Biomedicine and Environment, La Trobe University,  
24 Bundoora, VIC, Australia, <sup>4</sup>La Trobe Institute for Molecular Science, La Trobe University,  
25 Bundoora, VIC, Australia, <sup>5</sup>Bioimaging Platform, La Trobe University, Bundoora, VIC,  
26 Australia, <sup>6</sup>Genetic Mechanisms of Disease Laboratory, the Francis Crick Institute, London,  
27 United Kingdom, <sup>7</sup>Institute of Liver and Digestive Health, Royal Free Hospital, University  
28 College London, London, United Kingdom, <sup>8</sup>Department of Gastroenterology, Austin Health,  
29 Melbourne, VIC, Australia, <sup>9</sup>Department of Medicine, Austin Academic Centre, The  
30 University of Melbourne, Melbourne, VIC, Australia, <sup>10</sup>Institute for Molecular Bioscience, The  
31 University of Queensland, St. Lucia, Brisbane, QLD, Australia, <sup>11</sup>Department of Biochemistry  
32 and Pharmacology and Bio21 Molecular Science and Biotechnology Institute, The University  
33 of Melbourne, Melbourne, VIC, Australia, <sup>12</sup>Garvan Institute of Medical Research,  
34 Darlinghurst, NSW, Australia.

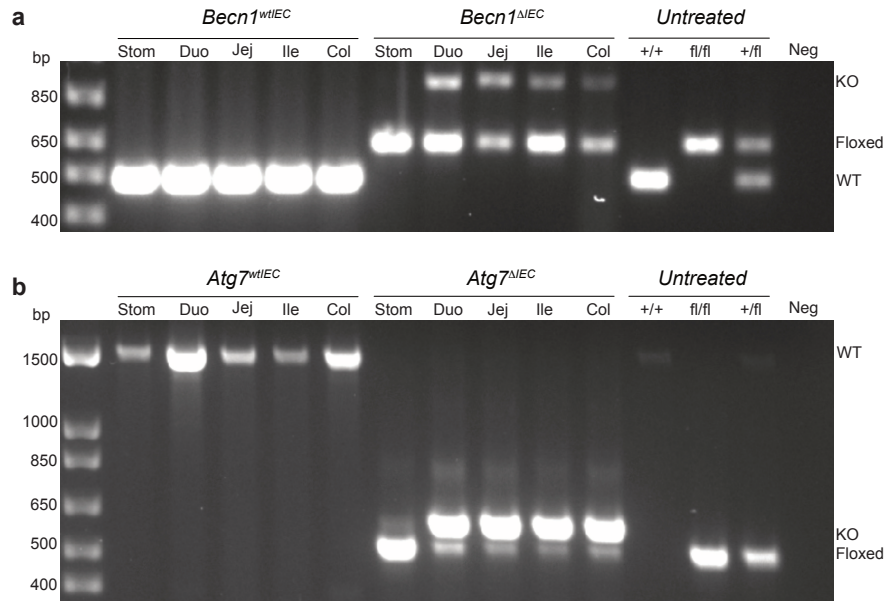

35  
 36  
 37  
 38  
 39  
 40

**Supplementary Fig. 1 PCR-based genotyping following tamoxifen-induced deletion of *Becn1* and *Atg7* in adult *Becn1<sup>fl/fl</sup>;Vil1-CreERT2<sup>Cre/+</sup>* - and *Atg7<sup>fl/fl</sup>;Vil1-CreERT2<sup>Cre/+</sup>* - derived intestinal epithelial cells. Stom: stomach. Duo: duodenum. Jej: jejunum. Ile: ileum. Col: colon. KO: knock-out. WT: wild-type**

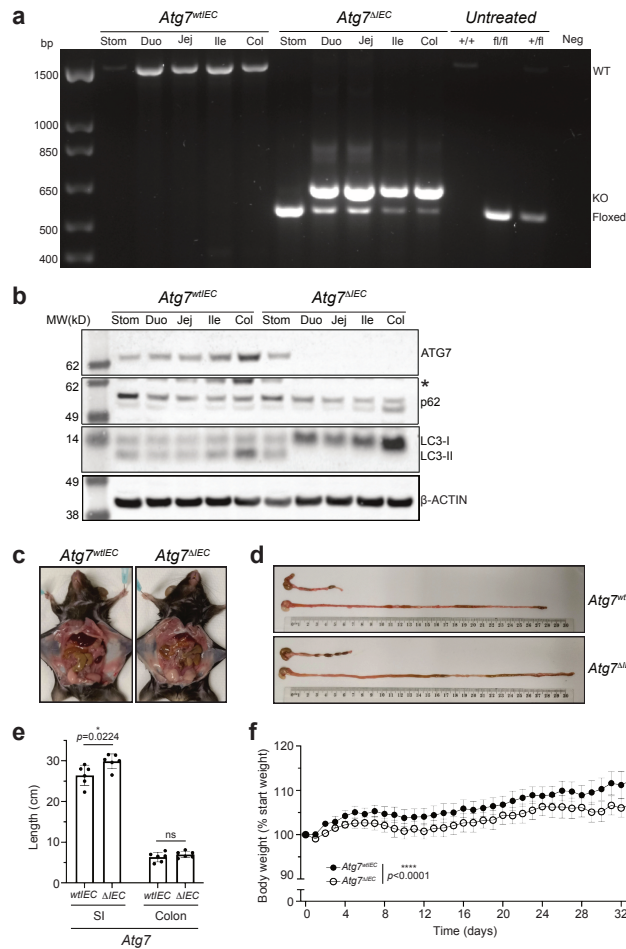

41

42 **Supplementary Fig. 2 Intestinal epithelium-specific loss of ATG7 in adult mice leads to**

43 **slightly longer small intestinal lengths and decreased body weight gain which develop**

44 **over one month. a** PCR-based genotyping and **b** Western blotting demonstrated successful

45 deletion of ATG7 in intestinal epithelial cells. Representative images of **c** abdominal necropsy

46 and **d** intestinal tracts demonstrating slightly increased small intestinal, but not colon, lengths.

47 However, there was no evidence of severe loss of intestinal homeostasis seen in the absence of

48 BECLIN1 over a significantly shorter time frame. **e** The absence of ATG7 over this extended

49 period of time leads to a decrease in body weight gain. For all data represented, at least n=6

50 biologically independent mice of each genotype were used. Data represent n=3 independent

51 experiments unless otherwise indicated. All graphs show the mean ± S.E.M. Significance was

52 determined by Wilcoxon's t-test. Stom: stomach. Duo: duodenum. Jej: jejunum. Ile: ileum.

53 Col: colon. KO: knock-out. WT: wild-type. \*: non-specific band.

54

55

56

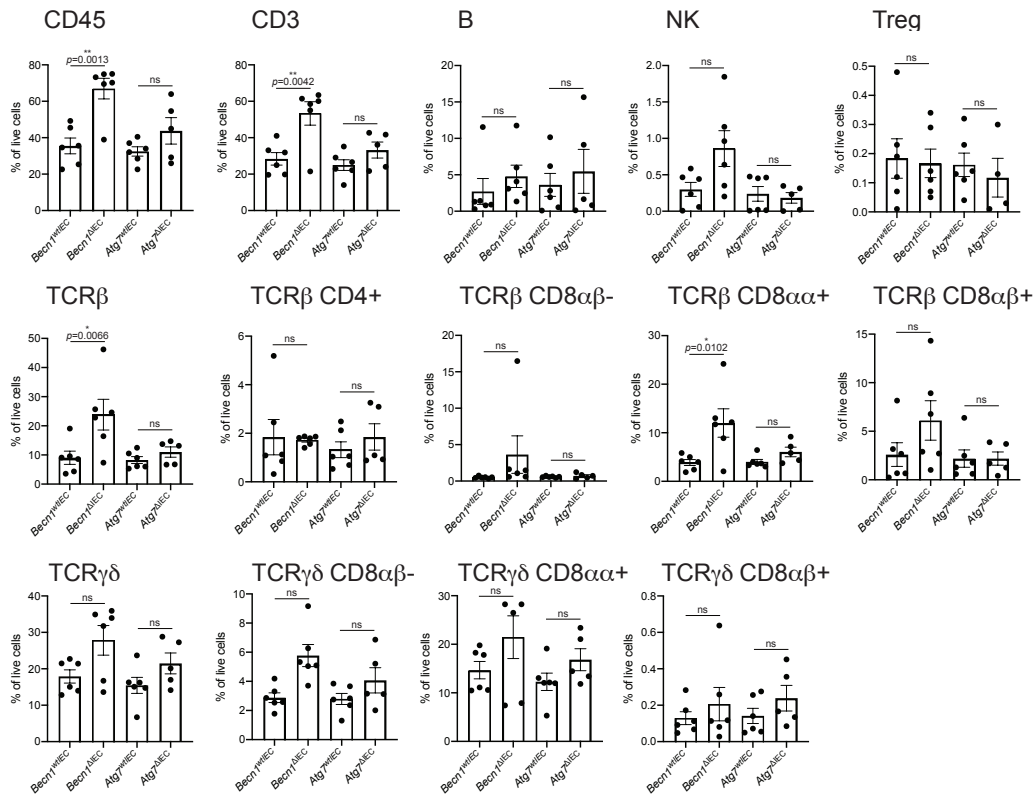

57

58 **Supplementary Fig. 3 Immunophenotyping of the intraepithelial lymphocytes in the small**

59 **intestines.** Graphs show the frequency of each indicated immune cell subtype within total live

60 cells. Data represent mean  $\pm$  S.E.M and significance determined by ordinary one-way

61 ANOVA. Data is representative of at least n=4 biologically independent mice of each genotype

62 from n=2 independent experiments.

63

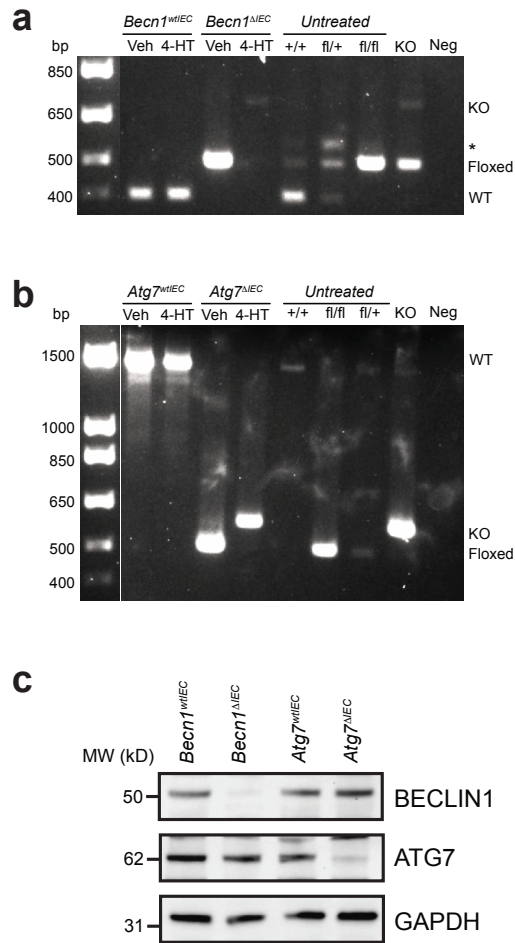

64

65

66 **Supplementary Fig. 4 Tamoxifen-induced deletion of *Becn1* and *Atg7* in *Becn1*<sup>fl/fl</sup>; *Vill1*-**  
 67 ***CreERT2*<sup>Cre/+</sup>- and *Atg7*<sup>fl/fl</sup>; *Vill1*-*CreERT2*<sup>Cre/+</sup>-derived intestinal organoids as detected by**  
 68 **a PCR genotyping and b Western blotting. \*: non-specific band.**

69

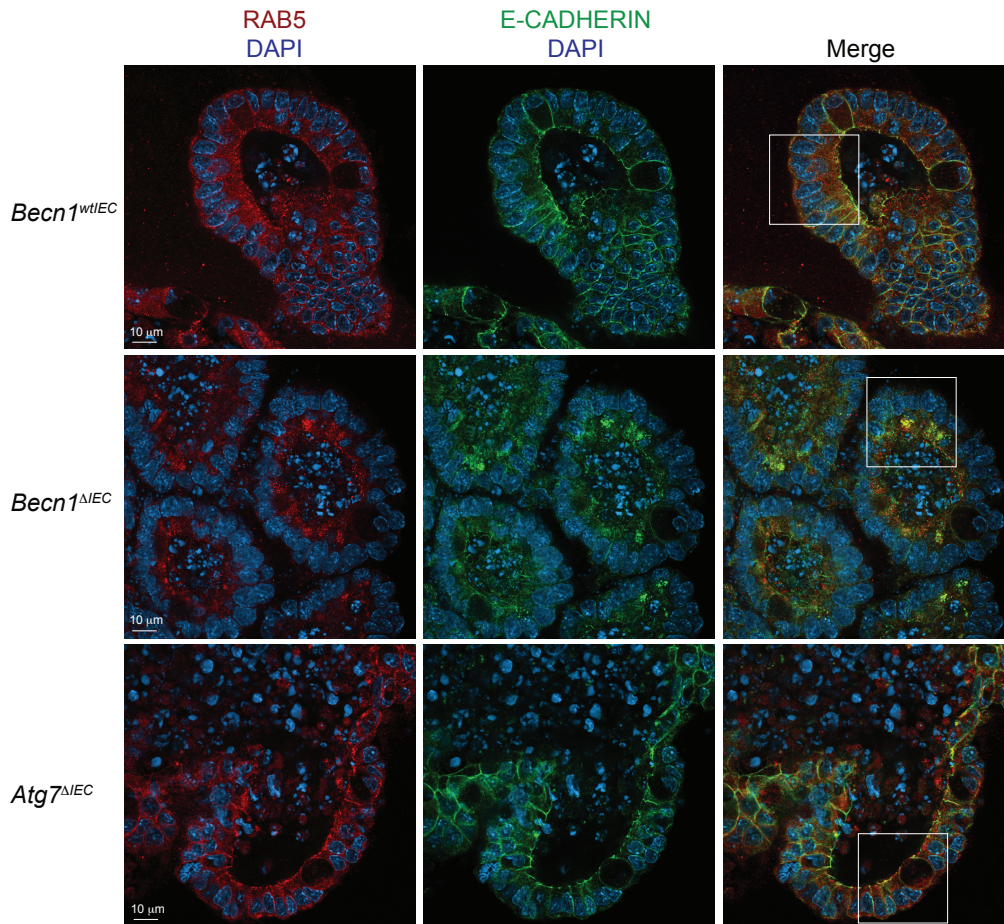

70

71

72 **Supplementary Fig. 5 Immunofluorescence staining of E-CADHERIN and RAB5<sup>+ve</sup> early**

73 **endosomes.** Immunofluorescence stained wild-type, *Becn1<sup>ΔIEC</sup>* and *Atg7<sup>ΔIEC</sup>* intestinal

74 organoids were assessed by confocal microscopy. Images are presented at 68x zoom. The white

75 box in the merged images refer to the areas represented in Fig. 5a. Data are representative of

76 at least n=3 independent experiments with at least n=3 different organoids from each

77 experiment.

78

79

80

81

82

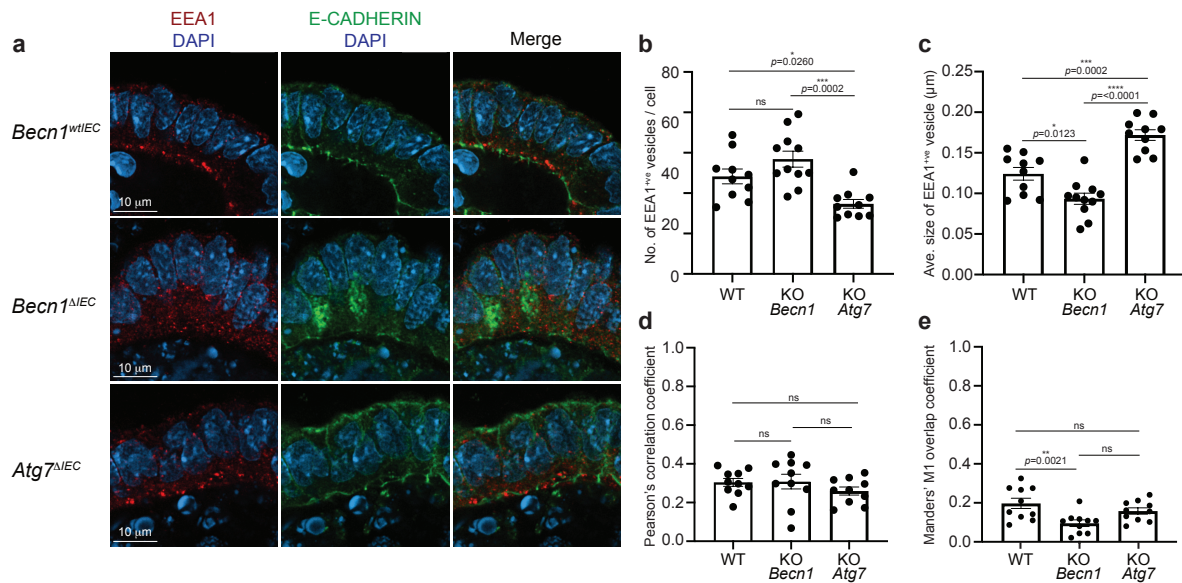

83

84

85 **Supplementary Fig. 6 Loss of BECLIN1 leads to aberrant EEA1+ve recruitment to early**  
 86 **endosomes with no change in colocalisation observed between E-CADHERIN and**  
 87 **EEA1<sup>+ve</sup> vesicles. a** The absence of BECLIN1, but not ATG7, leads to loss of apical membrane  
 88 staining of EEA1 as detected by whole-mount immunofluorescent staining of wild-type,  
 89 *Becn1<sup>ΔIEC</sup>* and *Atg7<sup>ΔIEC</sup>* intestinal organoids. **b** Loss of BECLIN1 did not cause changes to the  
 90 size of EEA1<sup>+ve</sup> vesicles, though loss of ATG7 did. **c** There were significant changes observed  
 91 in the average size of EEA1<sup>+ve</sup> vesicles when either BECLIN1 or ATG7 was absent. **d, e** The  
 92 absence of BECLIN1 did not increase the amount of E-CADHERIN colocalisation with  
 93 EEA1<sup>+ve</sup> early endosomes unlike that seen with RAB5<sup>+ve</sup> early endosomes suggesting a failure  
 94 to recruit EEA1 to the compartment. Data are representative of at least n=3 different slices per  
 95 organoid and of at least n=3 different organoids from three independent experiments. Graphs  
 96 indicate the mean ± S.E.M. Significance was determined by ordinary one-way ANOVA for  
 97 endosomal numbers, size and the Pearson's correlation coefficient and by two-way ANOVA  
 98 for the Mander's M1 overlap coefficient.

99

100

101

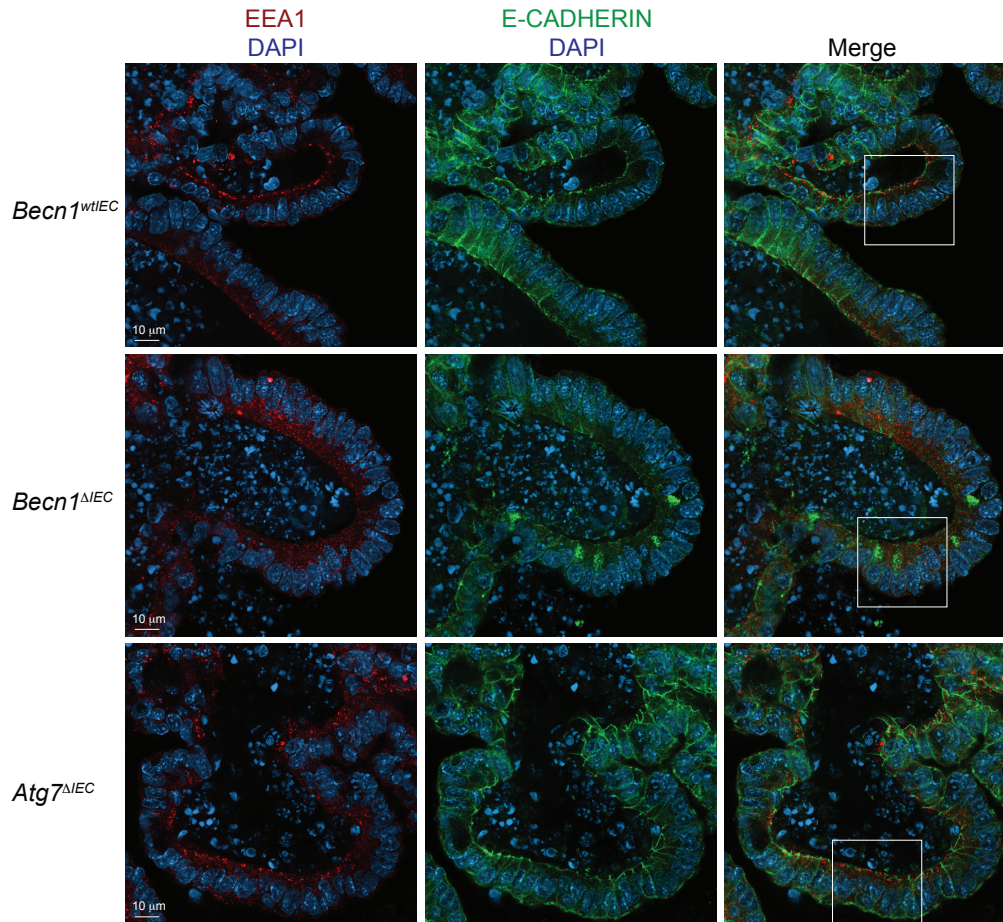

102

103 **Supplementary Fig. 7 Immunofluorescence staining of E-CADHERIN and EEA1<sup>+ve</sup> early**  
 104 **endosomes.** Immunofluorescence stained wild-type, *Becn1*<sup>ΔIEC</sup> and *Atg7*<sup>ΔIEC</sup> intestinal  
 105 organoids were assessed by confocal microscopy. Images are presented at 68x zoom. The white  
 106 box in the merged images refer to the areas represented in Supp Fig. 6. Data are representative  
 107 of at least n=3 independent experiments with at least n=3 different organoids from each  
 108 experiment.

109

110

111

112

113

114



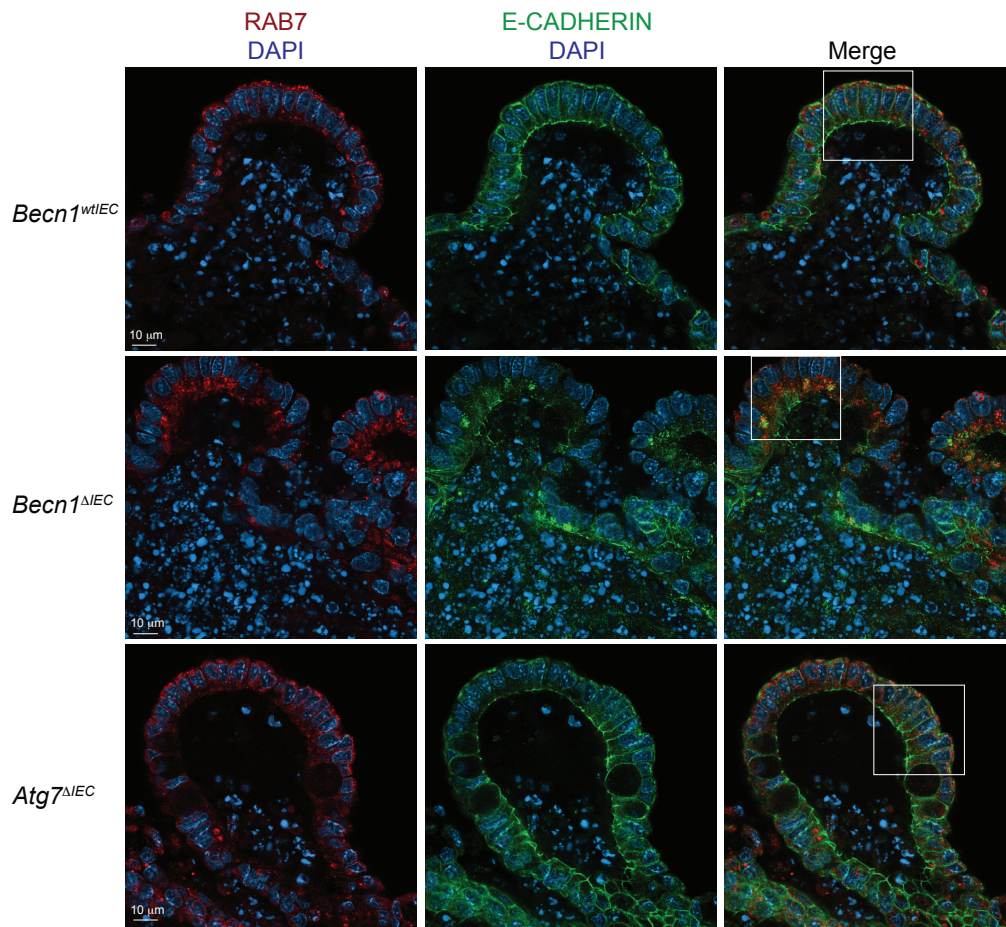

115  
 116 **Supplementary Fig. 8 Immunofluorescence staining of E-CADHERIN and RAB7<sup>+</sup> late**  
 117 **endosomes.** Immunofluorescence stained wild-type, *Becn1<sup>ΔIEC</sup>* and *Atg7<sup>ΔIEC</sup>* intestinal  
 118 organoids were assessed by confocal microscopy. Images are presented at 68x zoom. The white  
 119 box in the merged images refer to the areas represented in Fig. 5f. Data are representative of  
 120 at least n=3 independent experiments with at least n=3 different organoids from each  
 121 experiment.

122  
 123  
 124  
 125  
 126  
 127

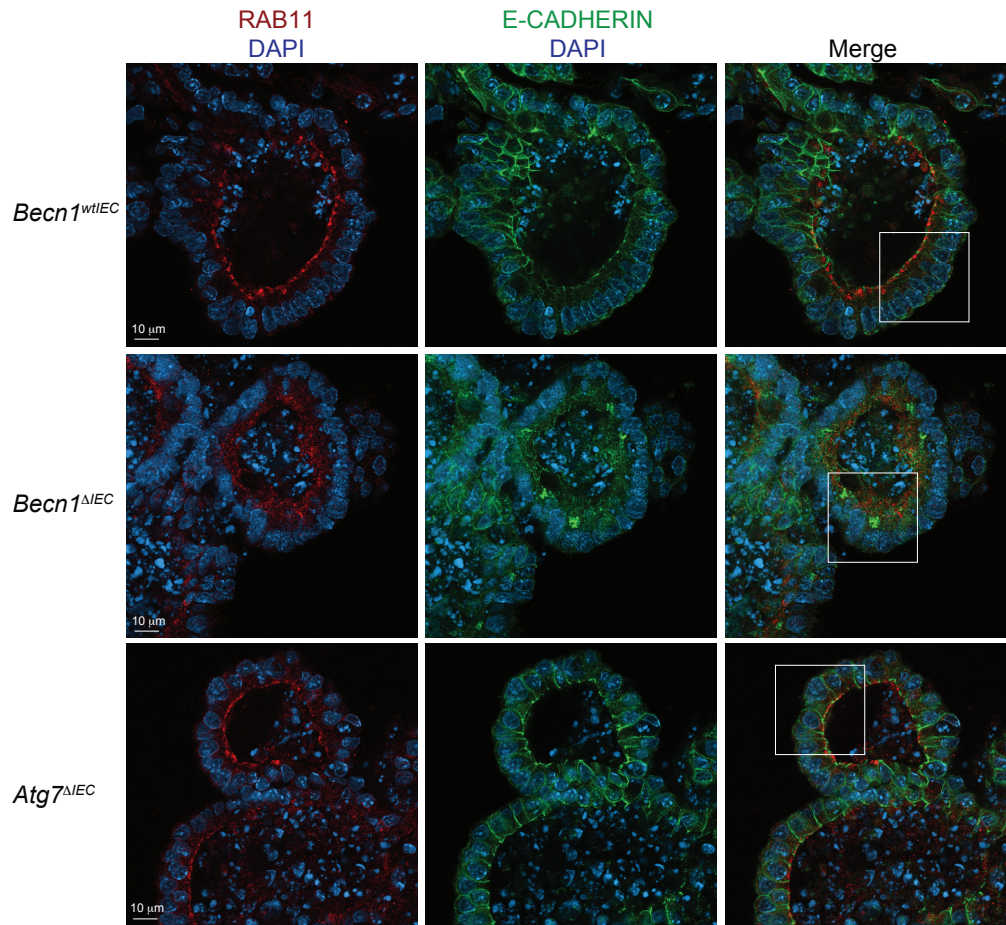

128

129 **Supplementary Fig. 9 Immunofluorescence staining of E-CADHERIN and RAB11<sup>+ve</sup>**  
 130 **recycling endosomes.** Immunofluorescence stained wild-type, *Becn1<sup>ΔIEC</sup>* and *Atg7<sup>ΔIEC</sup>*  
 131 intestinal organoids were assessed by confocal microscopy. Images are presented at 68x zoom.  
 132 The white box in the merged images refer to the areas represented in Fig. 5k. Data are  
 133 representative of at least n=3 independent experiments with at least n=3 different organoids  
 134 from each experiment.

135

136

137

138

139

140

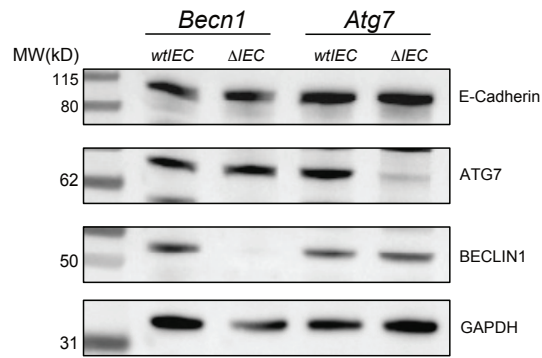

141

142 **Supplementary Fig. 10 BECLIN1 does not regulate total cellular levels, of E-CADHERIN**

143 **in intestinal epithelial cells.** Whilst the cellular localisation of E-CADHERIN is altered when

144 BECLIN1 is absent, the levels of E-CADHERIN remain the same. Data are representative of

145 at least n=3 independent experiments.

146

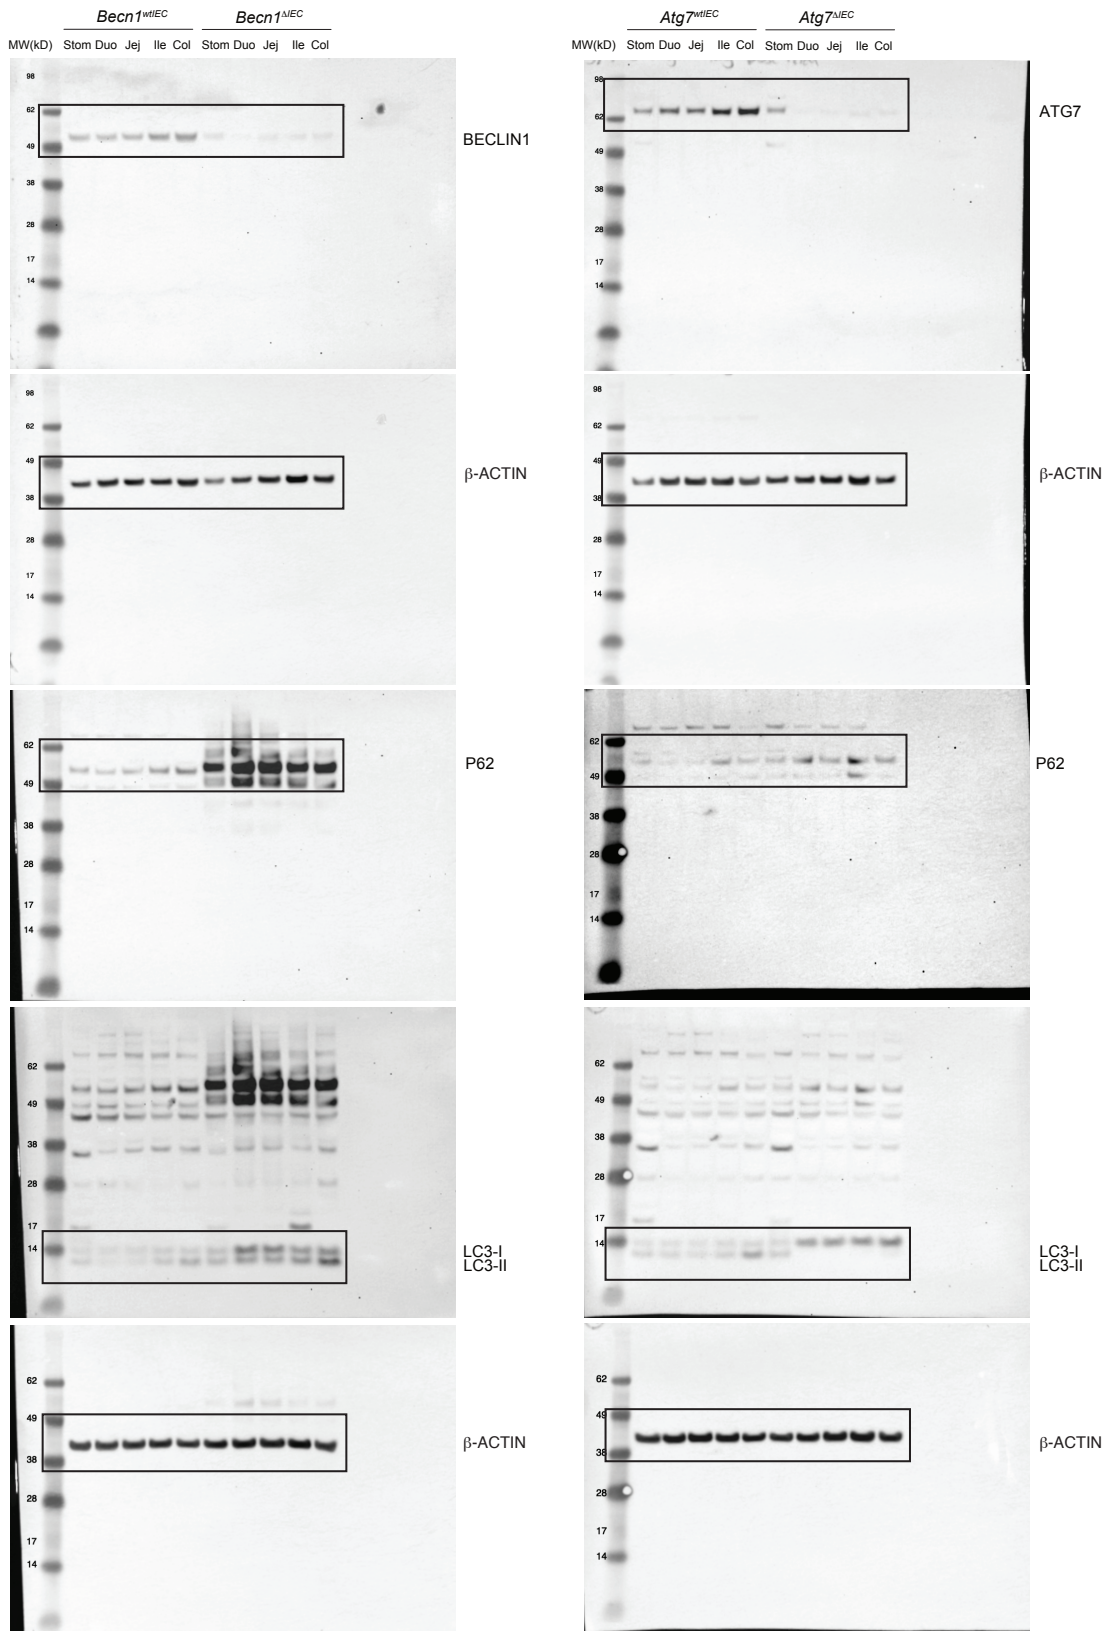

147

148 **Supplementary Fig. 11 Original immunoblots from Fig. 1b.** Intestinal epithelial cell lysates

149 from *Becn1*<sup>wtIEC</sup>, *Becn1*<sup>ΔIEC</sup>, *Atg7*<sup>wtIEC</sup> and *Atg7*<sup>ΔIEC</sup> mice were probed for BECLIN1, ATG7,

150 P62, LC3B and  $\beta$ -ACTIN. Identified rectangles represent the cropped image in the  
151 corresponding figure; each Western blot is representative of n=3 independent experiments.  
152

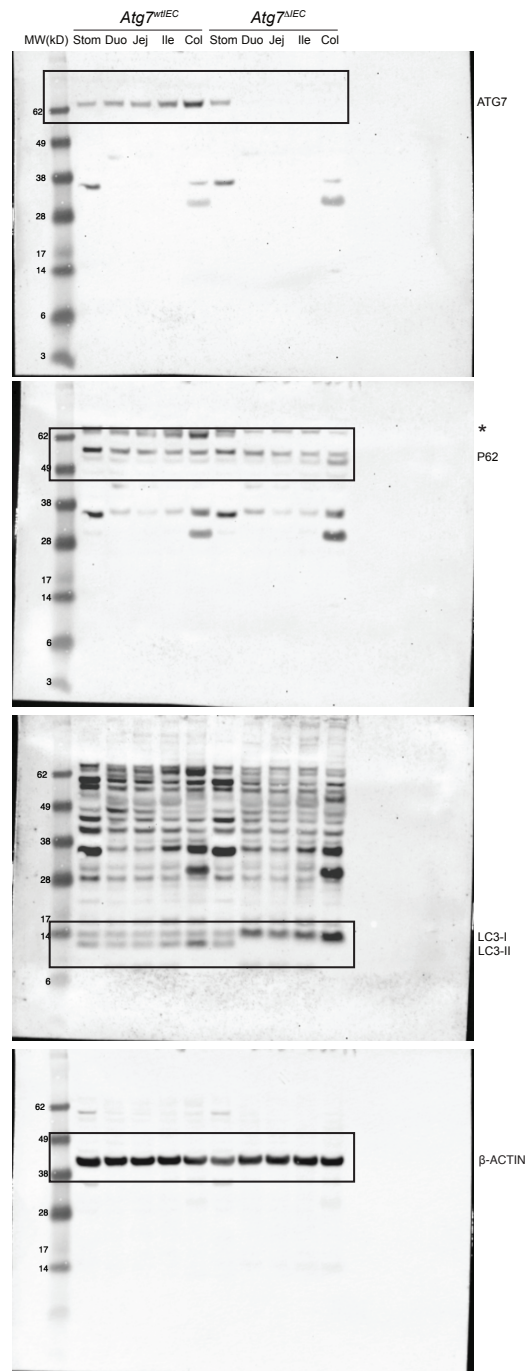

153  
154 **Supplementary Fig. 12 Original immunoblots from Supplementary Fig. 2b.** Intestinal  
155 epithelial cell lysates from *Atg7<sup>wtIEC</sup>* and *Atg7<sup>ΔIEC</sup>* mice were probed for ATG7, P62, LC3B and  
156  $\beta$ -ACTIN. Identified rectangles represent the cropped image in the corresponding figure; each  
157 Western blot is representative of n=3 independent experiments.  
158

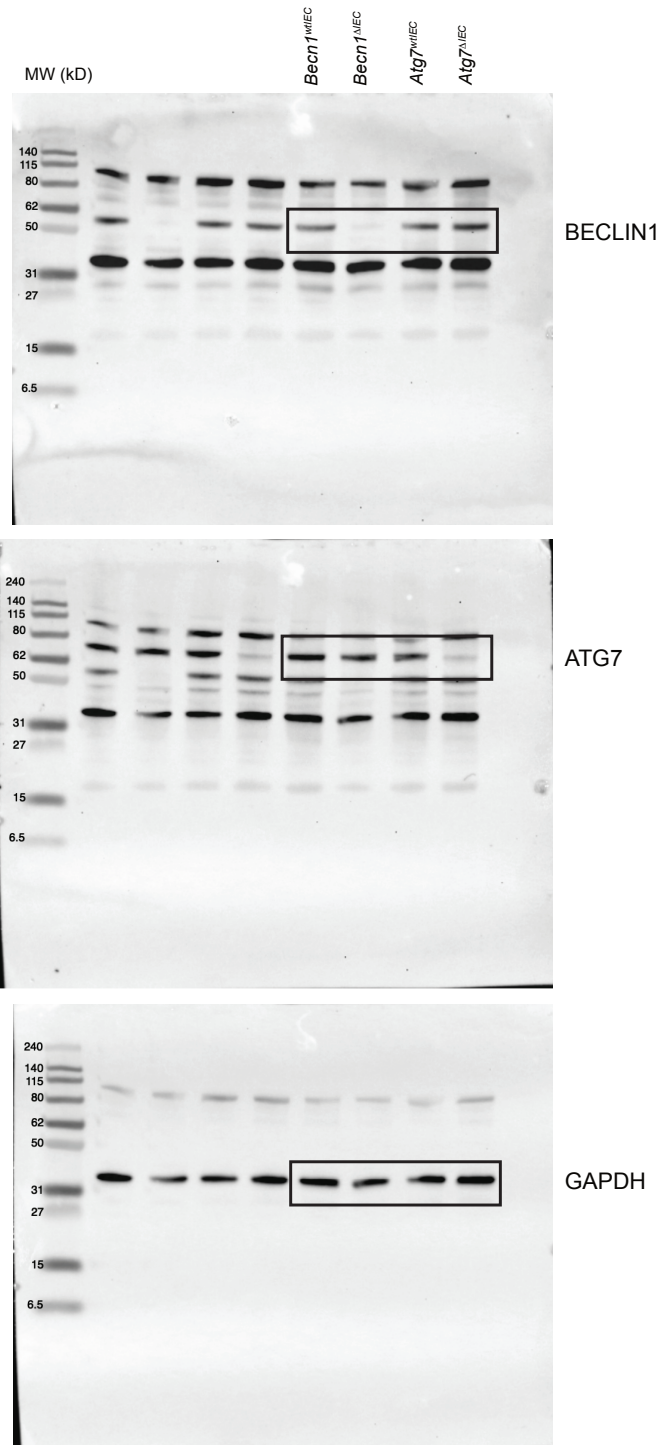

159

160 **Supplementary Fig. 13 Original immunoblots from Supplementary Fig. 4c.** Lysates from

161 *Becl1<sup>wtIEC</sup>*, *Becl1<sup>ΔIEC</sup>*, *Atg7<sup>wtIEC</sup>* and *Atg7<sup>ΔIEC</sup>* organoids were probed for BECLIN1, ATG7 and

162 GAPDH. Identified rectangles represent the cropped image in the corresponding figure; each

163 Western blot is representative of n=3 independent experiments.

164

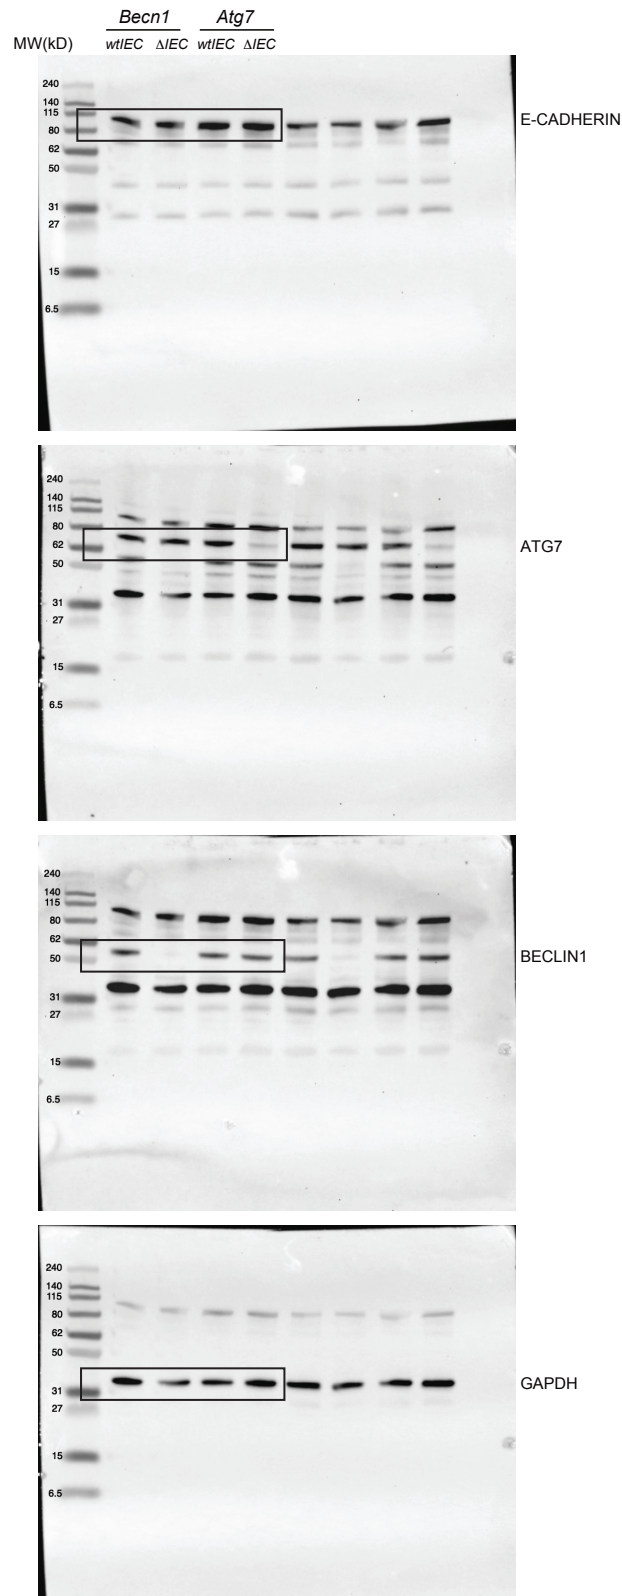

165

166 **Supplementary Fig. 14 Original immunoblots from Supplementary Fig. 10.** Lysates from  
 167 *Becn1<sup>wtIEC</sup>*, *Becn1<sup>ΔIEC</sup>*, *Atg7<sup>wtIEC</sup>* and *Atg7<sup>ΔIEC</sup>* organoids were probed for E-CADHERIN,  
 168 BECLIN1, ATG7 and GAPDH. Identified rectangles represent the cropped image in the  
 169 corresponding figure; each Western blot is representative of n=3 independent experiments.

170

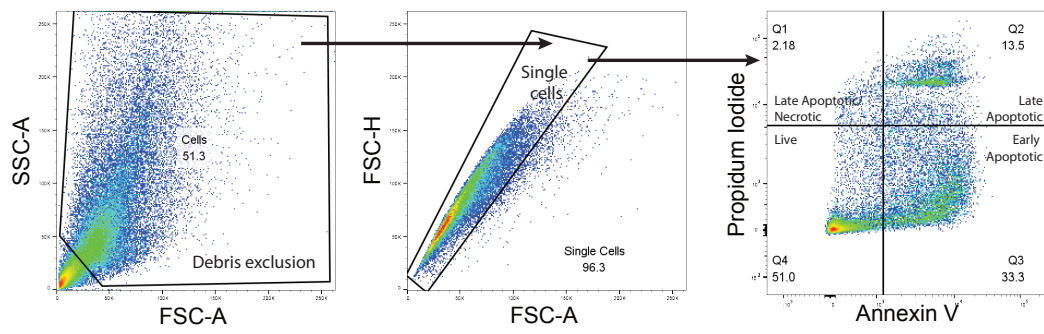

171

172

173 **Supplementary Fig. 15 Additional flow cytometry data for the detection of apoptotic**

174 **epithelial cells from intestinal organoids by propidium iodide (PI) / Annexin V staining.**

175 Gating strategy using in Fig. 4d.



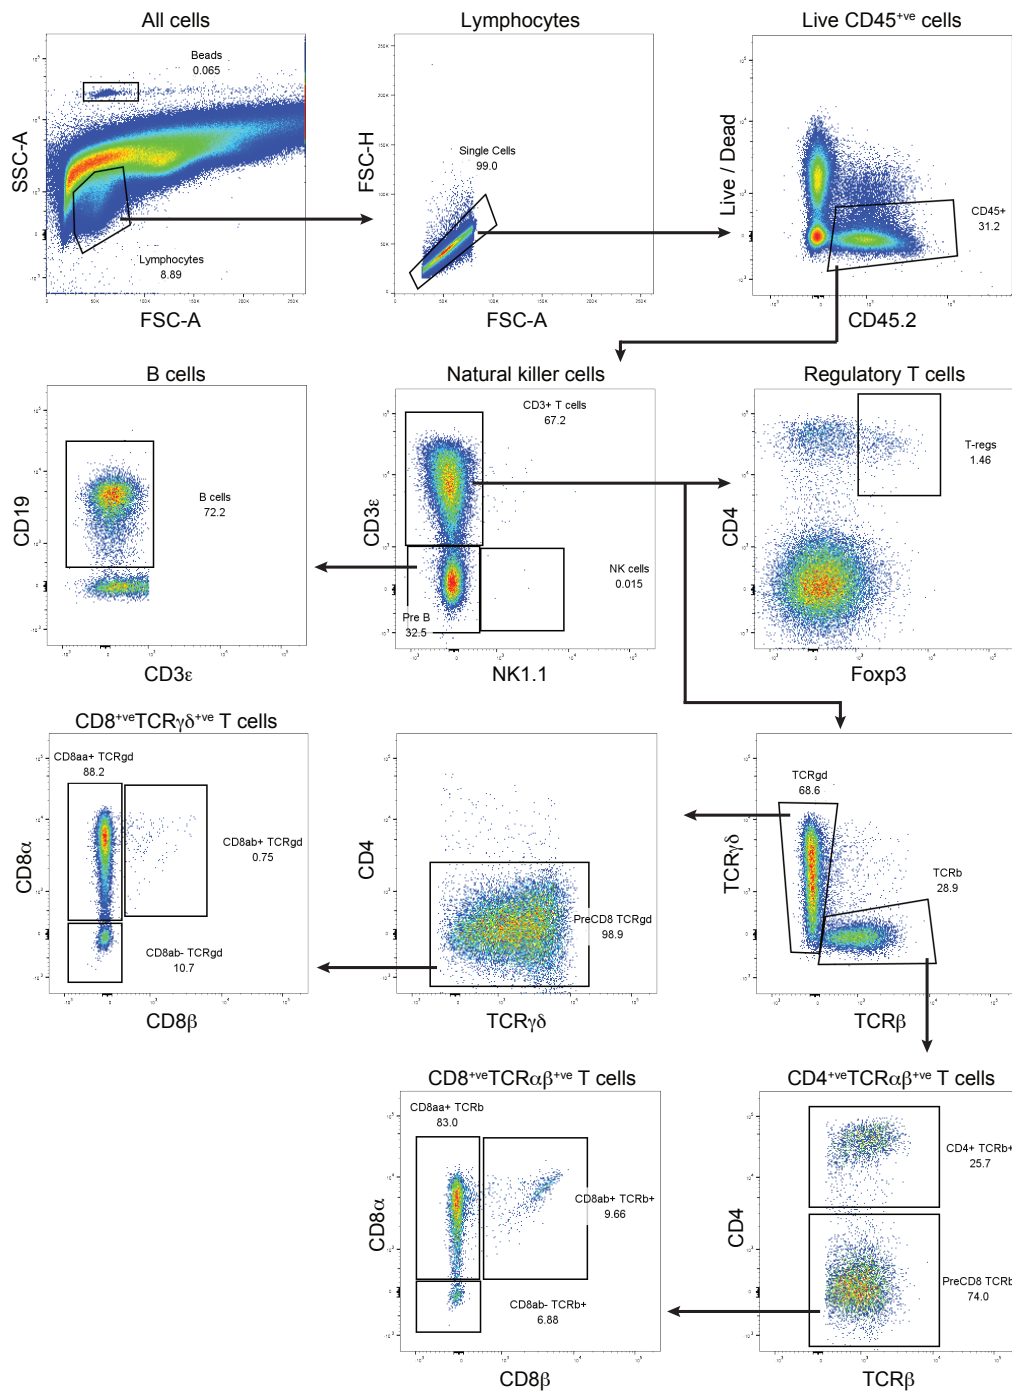

176

177

178 **Supplementary Fig. 16 Additional flow cytometry data for immunophenotyping of**

179 **intraepithelial lymphocytes in the small intestines. Gating strategy using in Supplementary**

180 **Fig. 3.**

181

182

183
